# Supplementary material for: Phytosynthesis of Palladium Nanoclusters: An Efficient Nanozyme for Ultrasensitive and Selective Detection of Reactive Oxygen Species
Source: PubMed Central journal article supplement (PMC7436022; doi:10.3390/molecules25153349), 2020-07-23
Supplement: molecules-25-03349-s001.pdf [file molecules-25-03349-s001.pdf]

1 Article

2 **Phytosynthesis of palladium nanoclusters: An**  
3 **efficient nanozyme for ultrasensitive and selective**  
4 **detection of reactive oxygen species**

5 Ravi Mani Tripathi <sup>1,2</sup>, and Sang J. Chung <sup>1,\*</sup>

6 <sup>1</sup> School of Pharmacy, Sungkyunkwan University, 2066 Seoburo, Jangan-gu, Suwon, Gyeonggido 16419,  
7 Korea.

8 <sup>2</sup> Amity Institute of Nanotechnology, Amity University Uttar Pradesh, Sector 125, Noida 201303, India

9 \* Correspondence: sjchung@skku.edu; Tel.: +82-31-290-7703; Fax +82-31-292-8800

10 Received: date; Accepted: date; Published: date

11

12 **Table S1.** Elemental compositions of PdNCs obtained with EDX analysis.

13

| Element | Line Type | k Factor | k Factor type | Absorption Correction | Wt%    | Wt% Sigma | Atomic % |
|---------|-----------|----------|---------------|-----------------------|--------|-----------|----------|
| Cu      | K series  | 1.233    |               | 0.50                  | 28.39  | 0.33      | 39.90    |
| Pd      | L series  | 1.809    |               | 0.60                  | 71.61  | 0.33      | 60.10    |
| Total:  |           |          |               |                       | 100.00 |           | 100.00   |

14

15

16

17

18

19

20

21

22

23

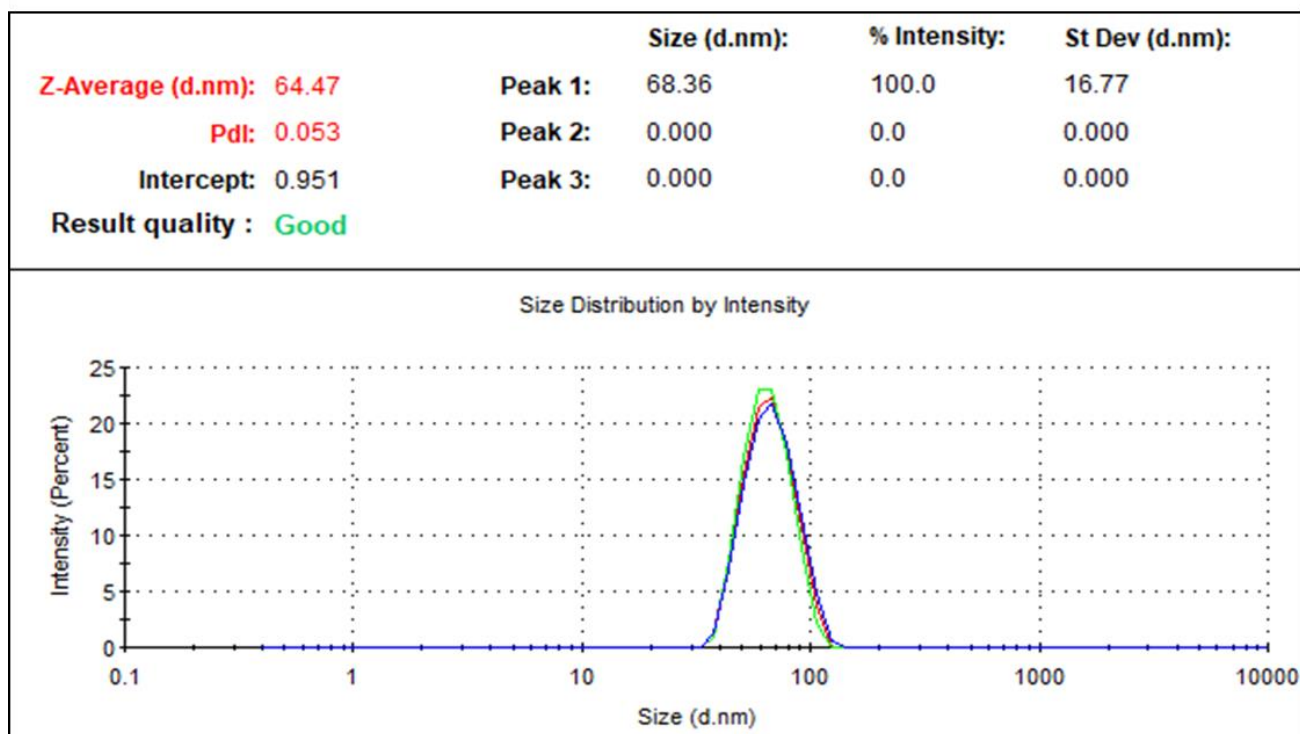

24

25

26 **Figure S1.** Size distribution profile of biosynthesized nanoclusters.

27

28

29

30

31

32

33

34

35

36

37

38

39

40

41

42

43

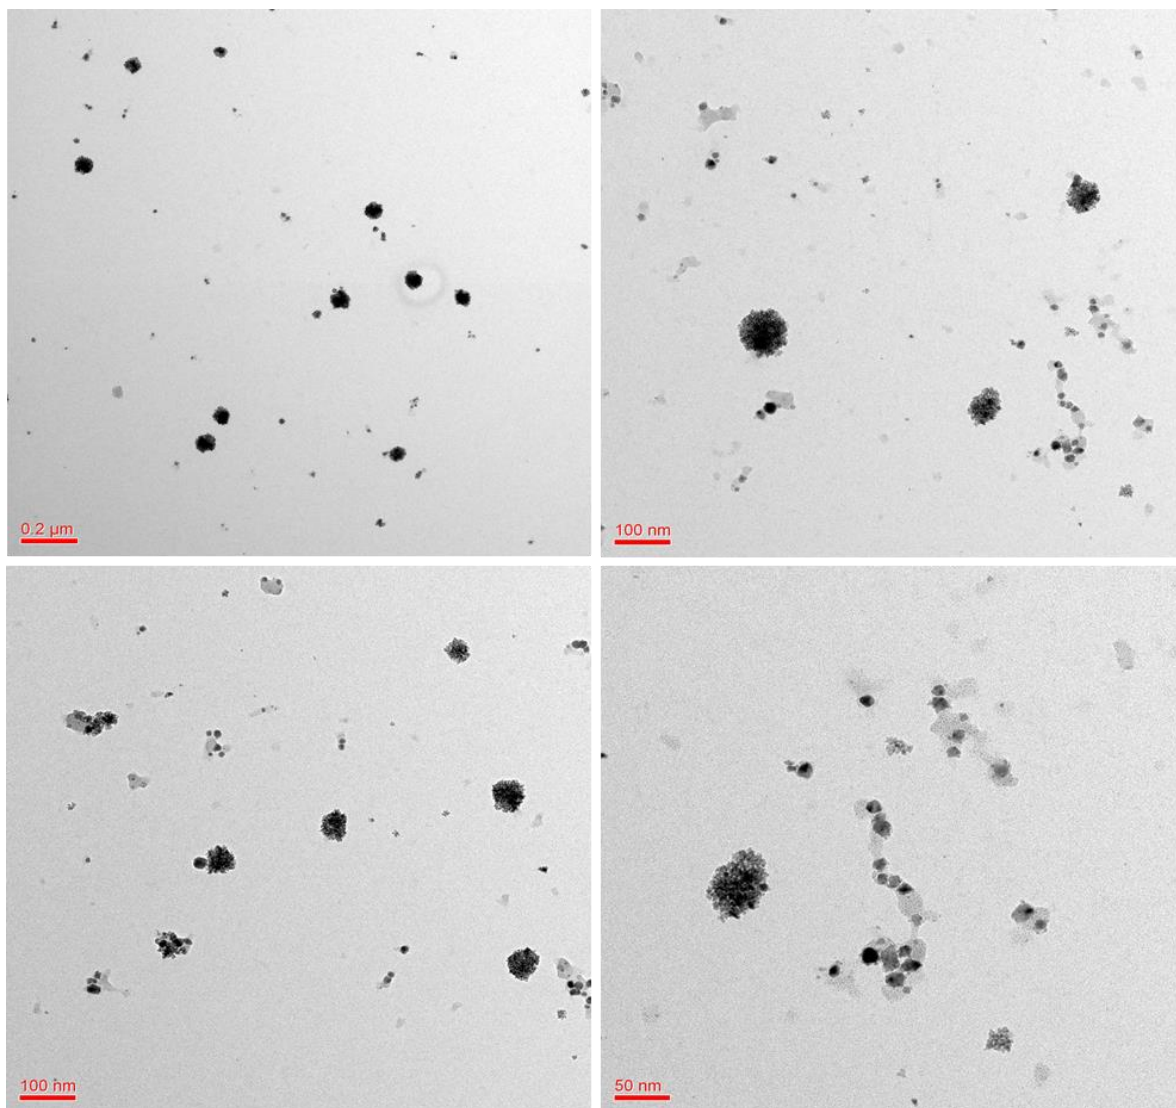

44

45

46 **Figure S2.** Various magnifications of TEM micrographs of PdNCs obtained after sonication of colloidal  
47 solution of nanoclusters for assessing their stability.

48

49

50

51

52

53

54

55

56

57

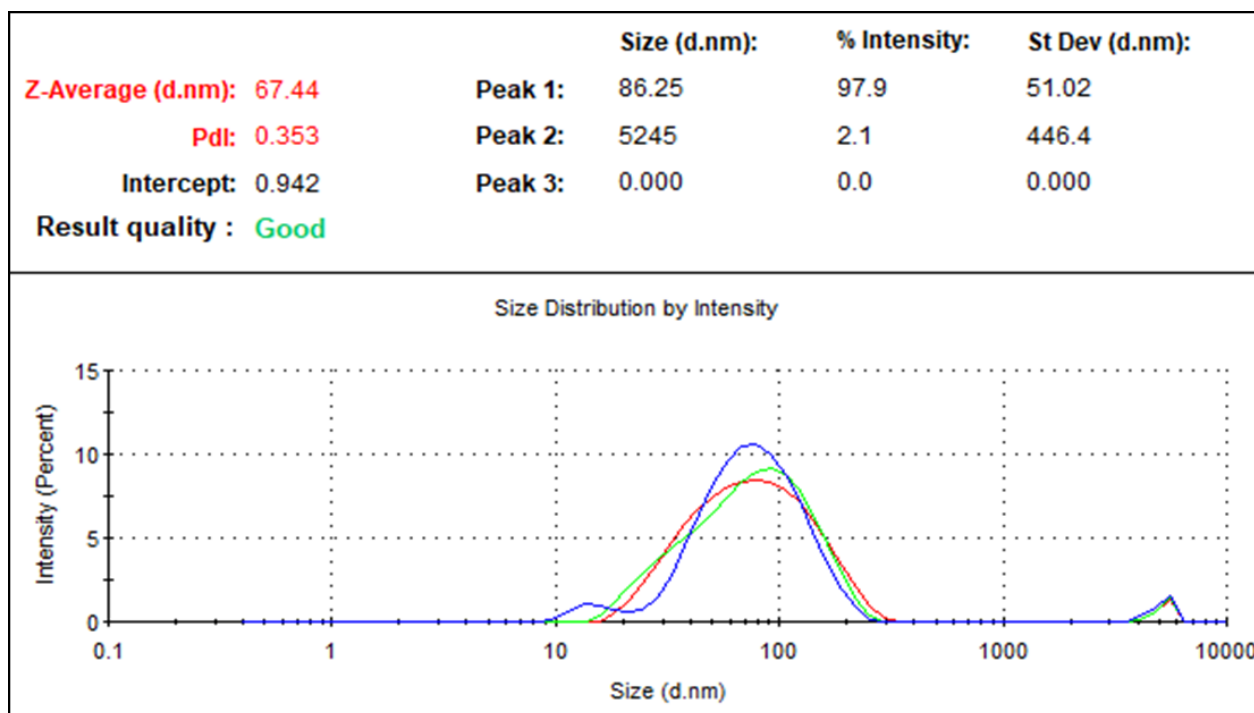

58

59

60 **Figure S3.** DLS obtained after sonication of colloidal solution of nanoclusters for assessing their stability.

61

62

63

64

65

66

67

68

69

70

71

72

73

74

75

76

77

78

79

80

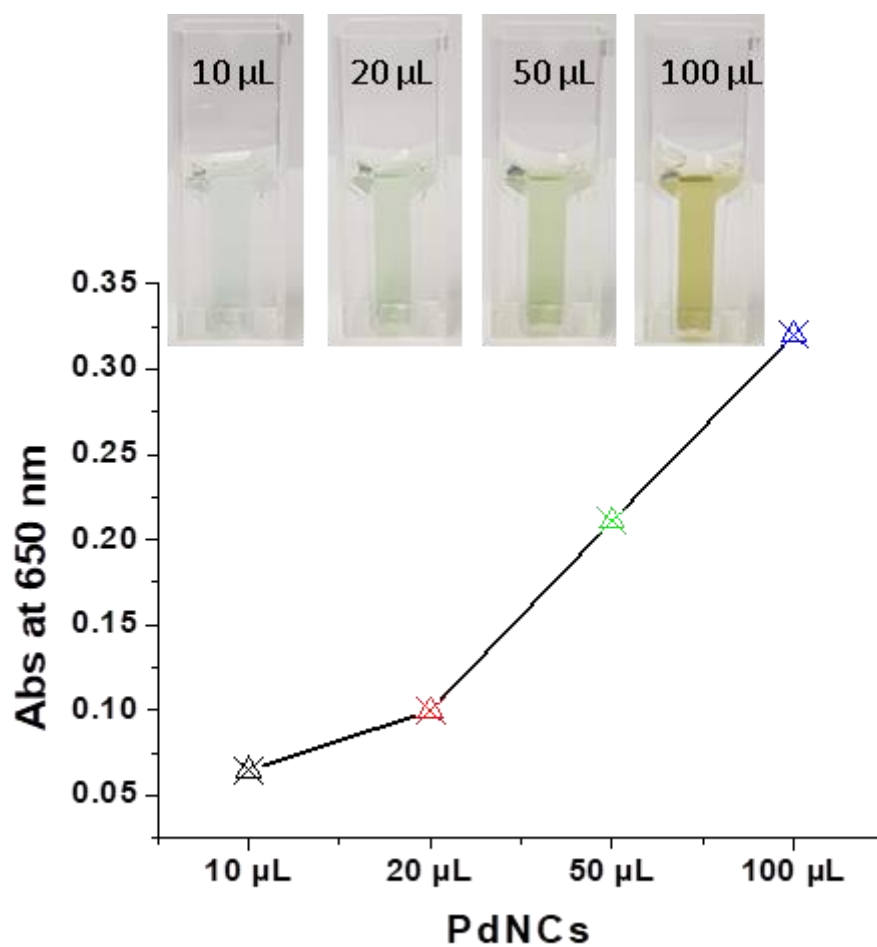

81

82

83 **Figure S4.** Results for the control assay (without H<sub>2</sub>O<sub>2</sub>) showing absorbance at 650 nm in response to the  
84 addition of varying amounts of as-synthesized nanoclusters. Inset cuvettes show impact of nanocluster  
85 concentration on intensity of color without H<sub>2</sub>O<sub>2</sub>.

86

87

88

89

90

91

92

93

94

95

96

97

98

99

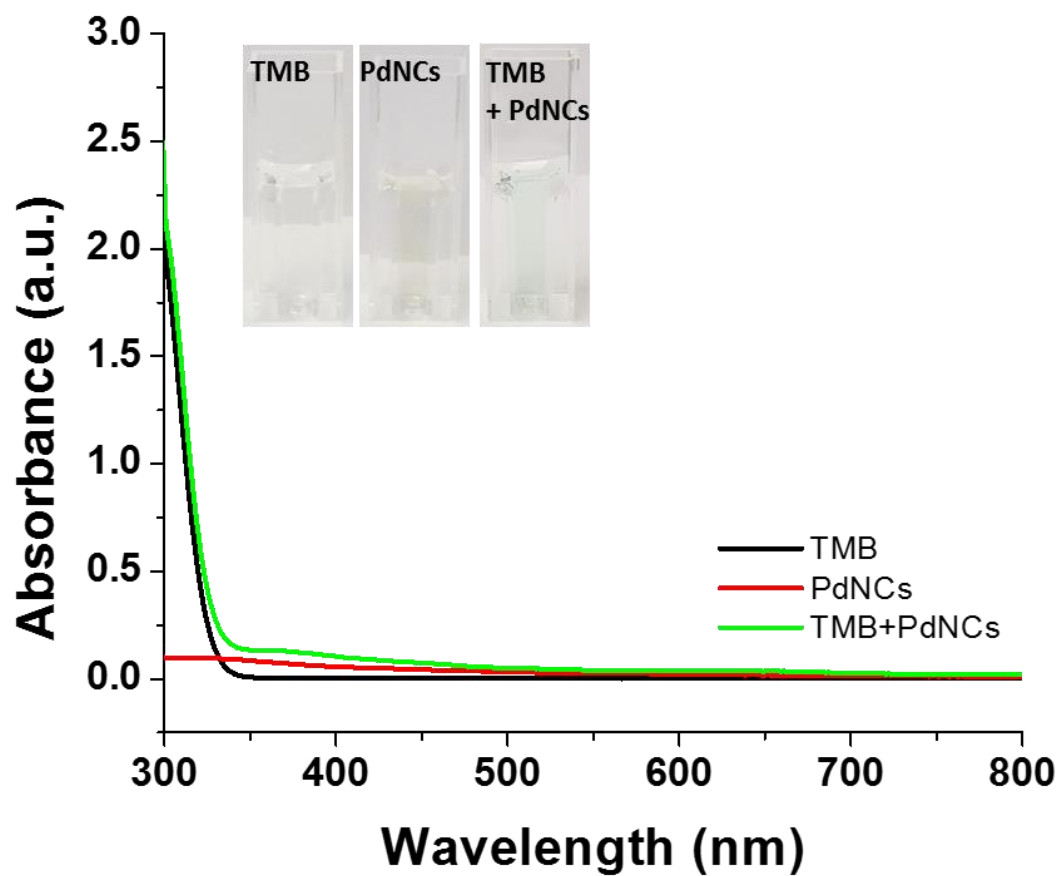

100  
101  
102  
103  
104  
105  
106  
107  
108  
109  
110  
111  
112  
113  
114  
115  
116  
117

**Figure S5.** Absorbance spectra of 0.525 mM TMB, 10  $\mu$ L nanoclusters, and the combination of both; the inset cuvettes show the color.

118

119

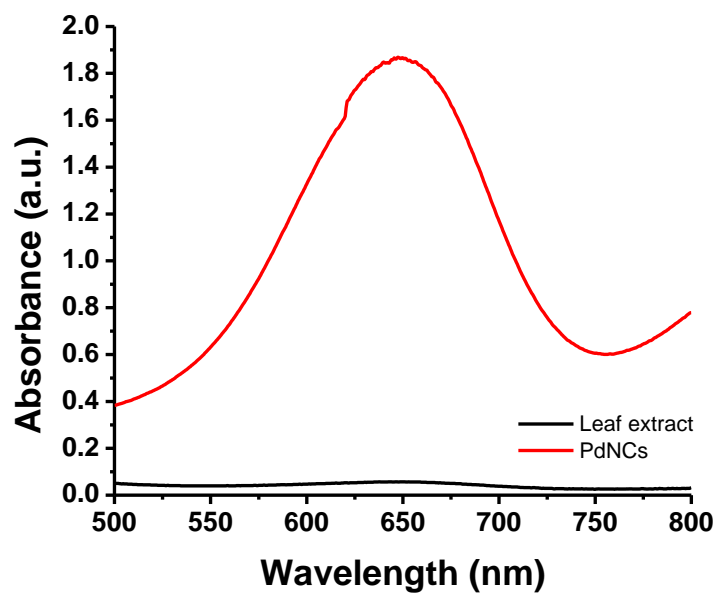

120

121 **Figure S6.** Comparative analysis for TMB oxidation between biosynthesized PdNCs and leaf extract.

122

123

124

125

126

127

128

129
